# Supplementary material for: Lineage-specific control of convergent differentiation by a Forkhead repressor
Source: Oxford University Press journal article supplement (doi:10.1242/dev.199493), 2021-08-23
Supplement: dev199493supp.pdf [file dev199493supp.pdf]

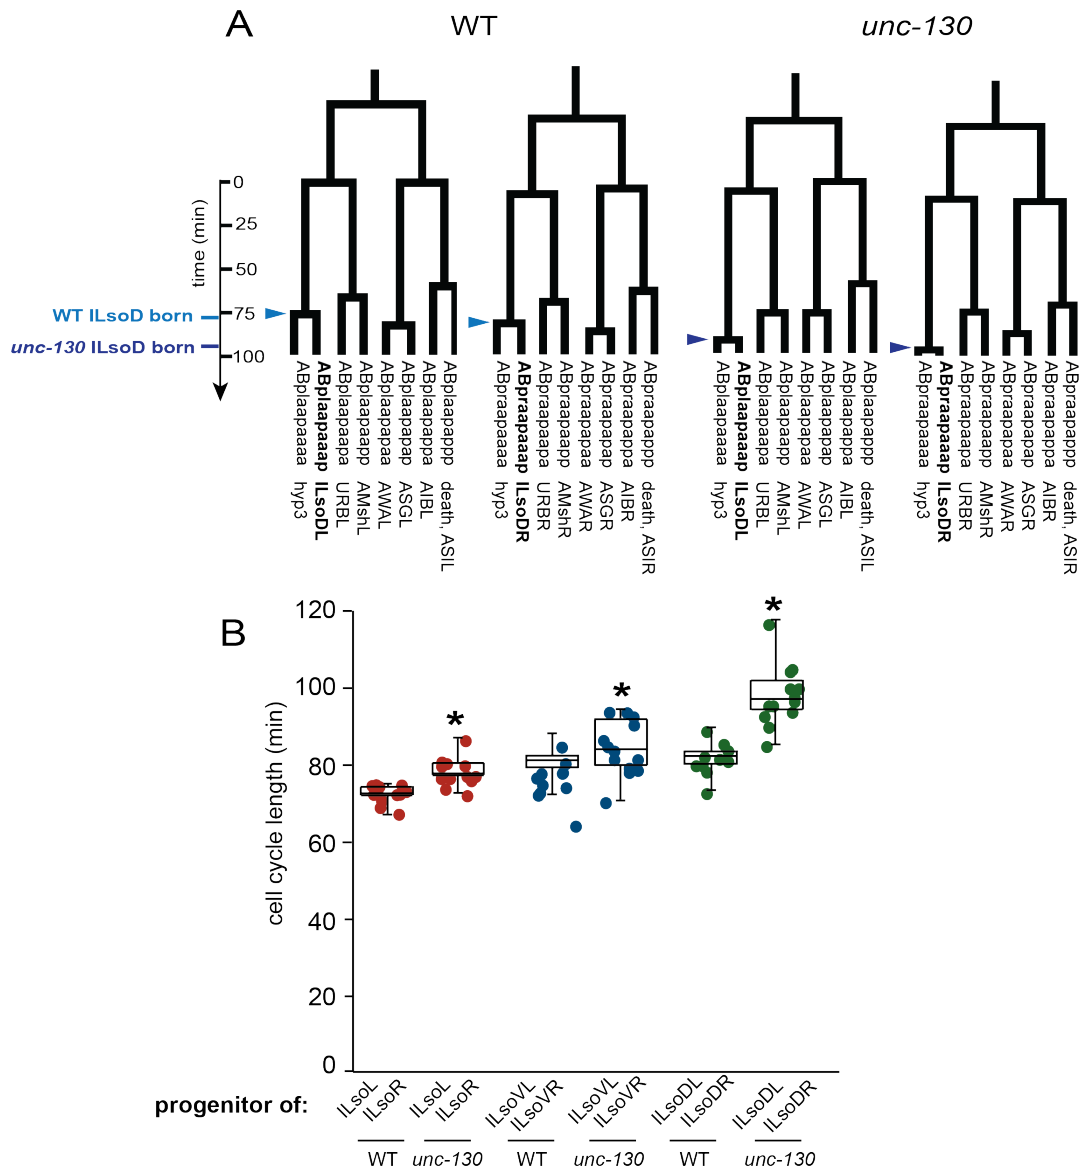

**Fig. S1. Related to Fig. 1**

(A) Two example ILsoD (ABpxaapaa) lineages from wild-type and *unc-130* mutant embryos. Light blue arrowheads denote division of wild-type ILsoD progenitors and dark blue arrowheads denote divisions of *unc-130* mutant ILsoD progenitors that produce ILsoD and hyp3 cells. (B) Cell cycle lengths of ILsoL, ILsoR, ILsoVL, ILsoVR, ILsoDL, and ILsoDR progenitor cells in wild-type and *unc-130* mutant embryos. n = 6 for wild type, n = 8 for *unc-130* mutants. Center lines represent population median. Asterisks denote *p*-value < 0.05 as calculated by Welch's t-test.

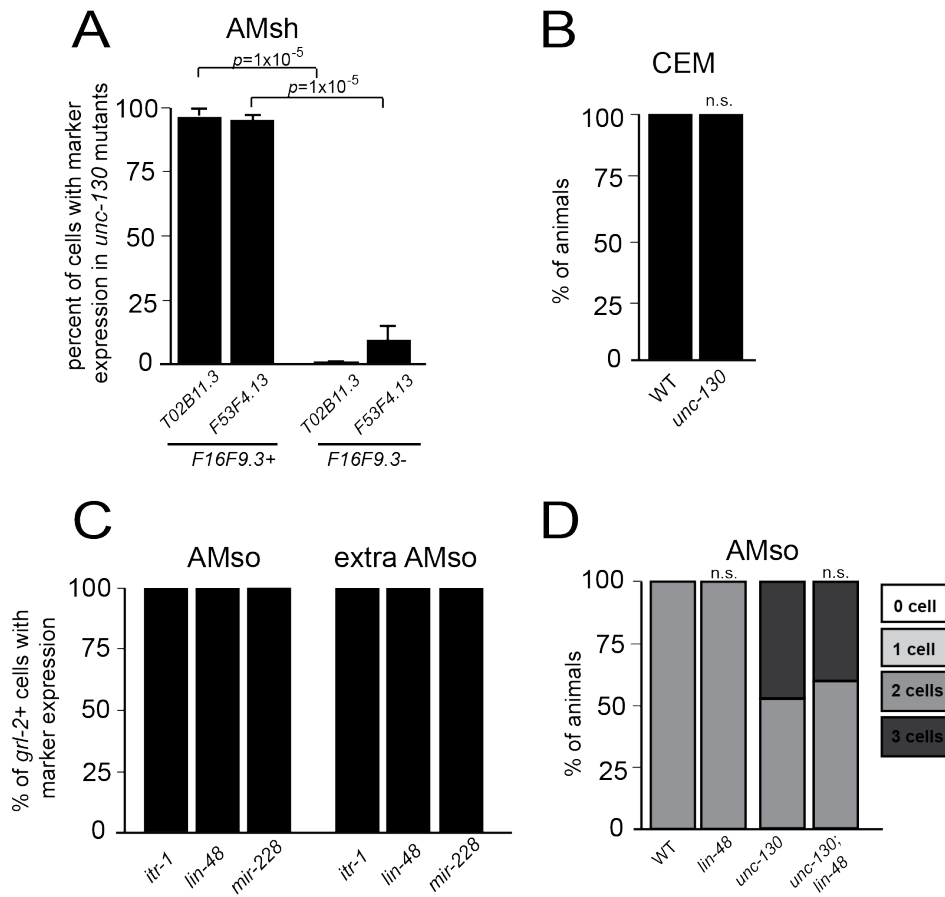

AMso - lateral view

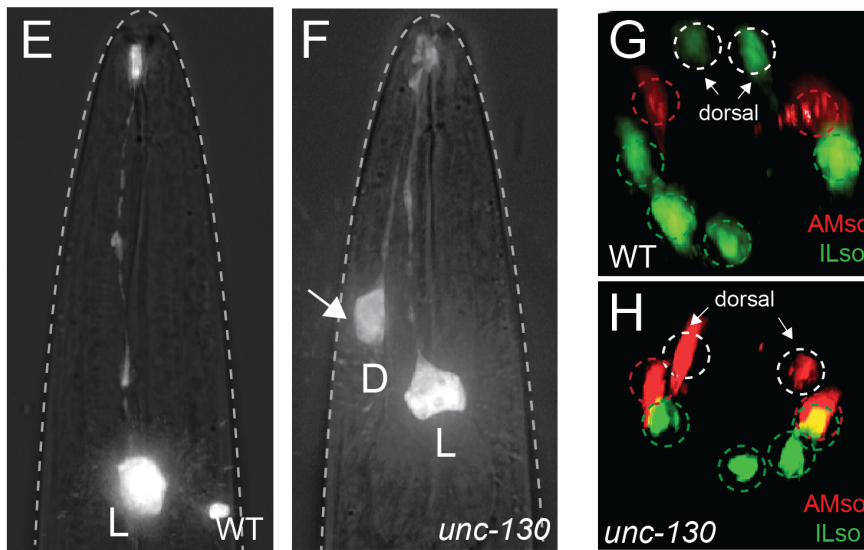

**Fig. S2. Related to Fig. 2**

(A) Percentage of *F16F9.3+* and *F16F9.3-* cells co-expressing AMsh markers, *T02B11.3pro:GFP* and *F53F4.13pro:GFP*, in *unc-130* mutant animals.  $n \geq 20$  cells per marker. Error bars – standard error of proportion. *p*-values calculated by z-score for two population proportions. (B) Percentage of wild-type and *unc-130* mutant males expressing the CEM neuron marker, *pkd-2pro:GFP*. The CEM neuron is the sister cell of AMso in males. (C) Percentage of *grl-2+* cells co-expressing AMso markers, *itr-1pro:GFP* and *lin-48pro:GFP*, and glial marker *mir-228pro:histone-GFP* in endogenous and extra cells in *unc-130* mutants.  $n \geq 20$  cells per marker. (D) Percentage of animals expressing AMso-specific marker *grl-2pro:YFP* in zero, one, two, three or more cells in wild type, *lin-48*, *unc-130*, and *lin-48; unc-130* double mutants.  $n=50$  animals per genotype. *p*-values were calculated by Fisher's Exact test. Lateral views of wild-type (E) and *unc-130* mutant (F) animals expressing AMso marker, *grl-2pro:YFP*. Arrow indicates extra cell. In lateral views, the other endogenous AMso cell is not visible. D – dorsal, L – lateral. En face views of wild-type (G) and *unc-130* mutant (H) animals co-expressing *grl-18pro:GFP* to mark ILso glia and *grl-2pro:mApple* to mark AMso glia. Arrows indicate cells in the dorsal position. There are two extra AMso glia in this particular *unc-130* mutant animal.

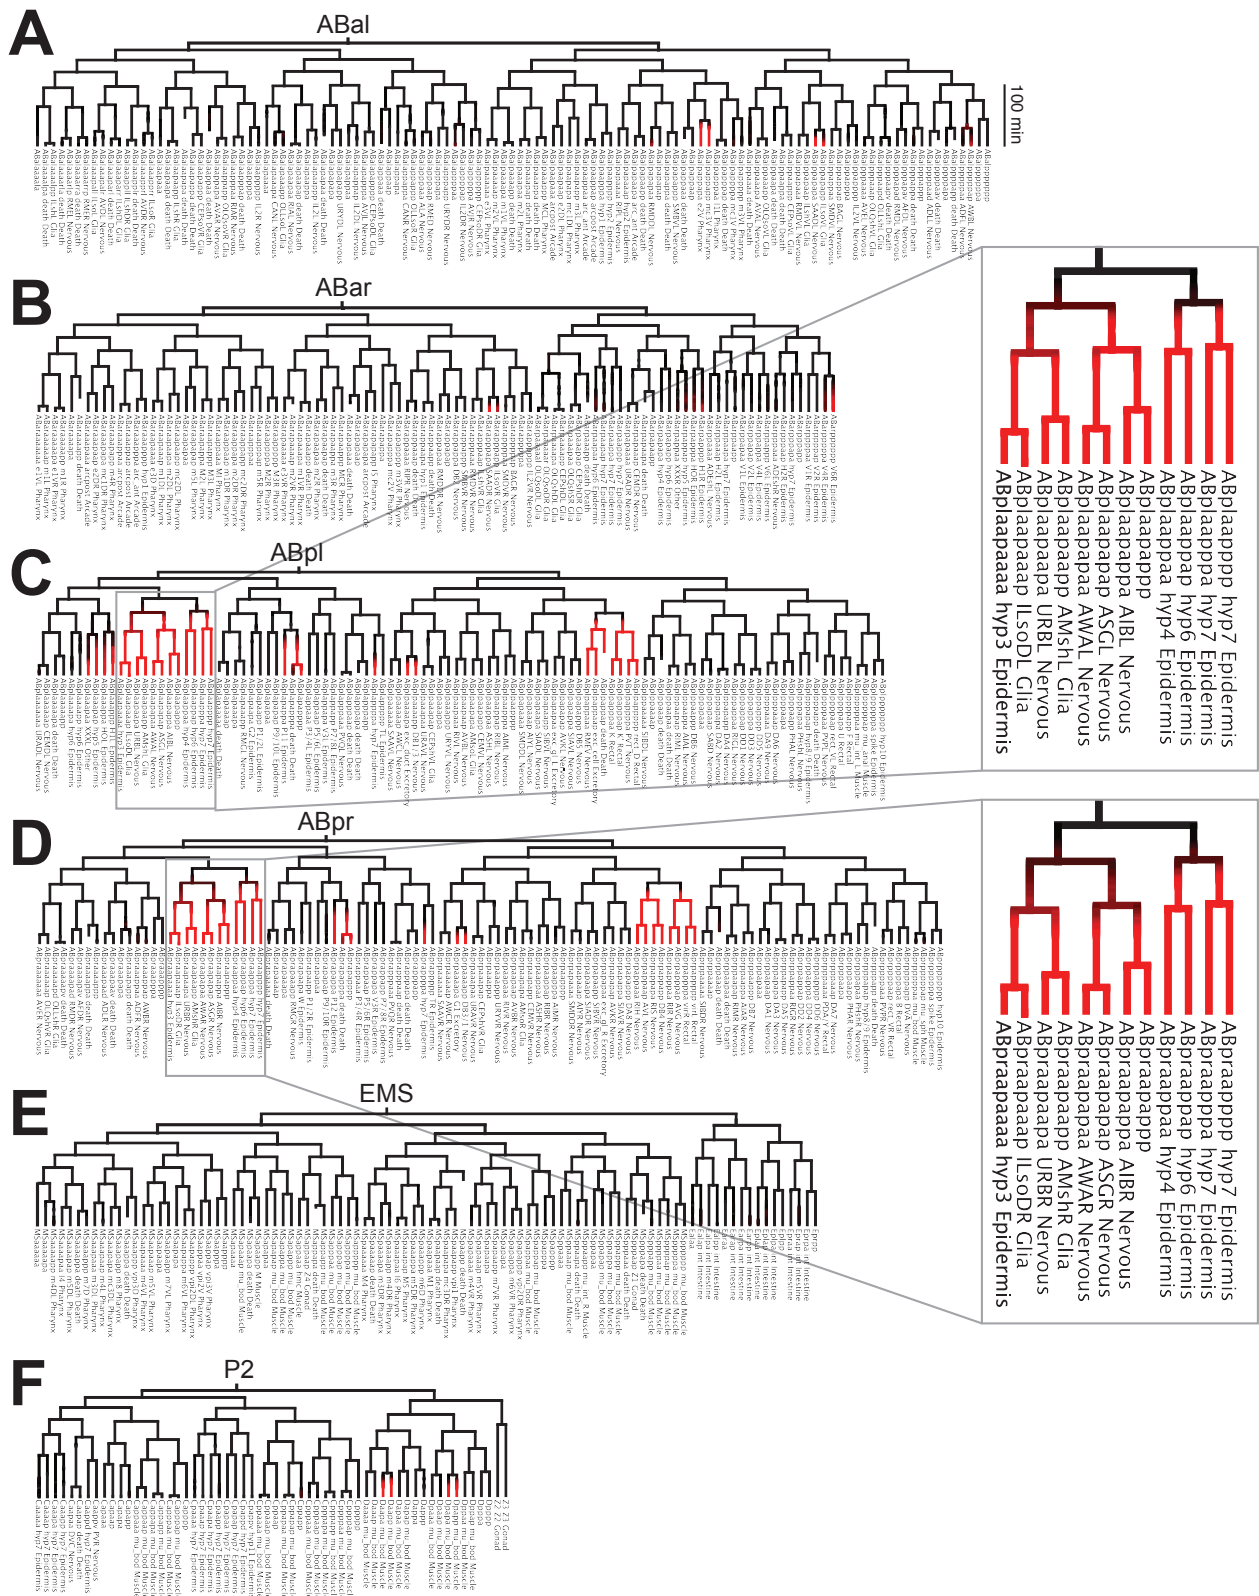

**Fig. S3. Related to Fig. 3**

(A-F) Lineage diagram of all embryonic divisions in a wild-type embryo from the lineaging strain RW11144, which expresses UNC-130:GFP. (A) ABal, (B) ABar, (C) ABpl, (D) ABpr, (E) MS and E, and (F) C, D, and Z lineages. UNC-130 expression levels are indicated in red.

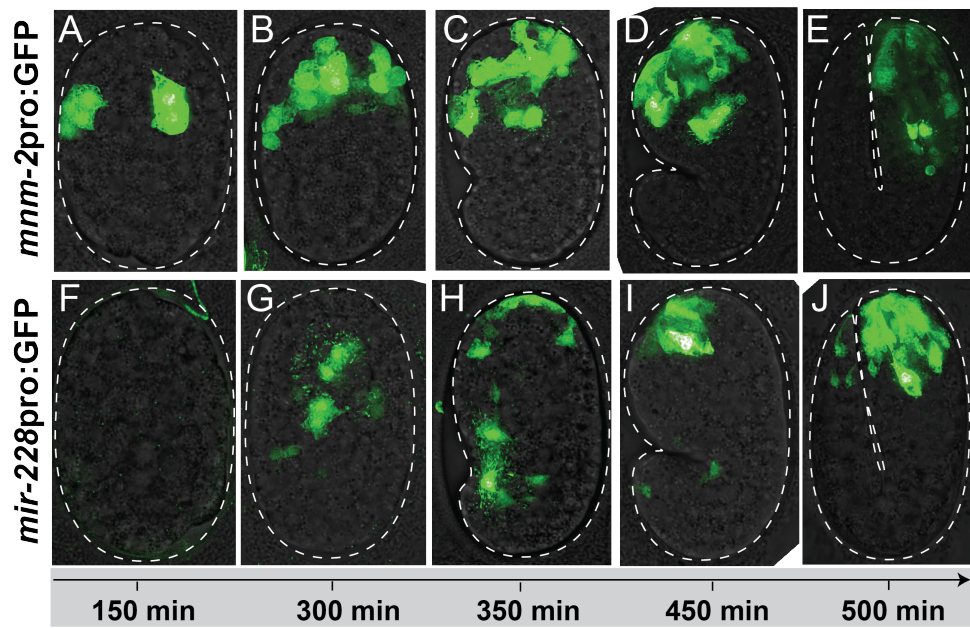

**Fig. S4. Related to Fig. 3.**

Time course of *mnm-2pro:GFP* (A-E) and *mir-228pro:GFP* (F-J) expression in embryos.

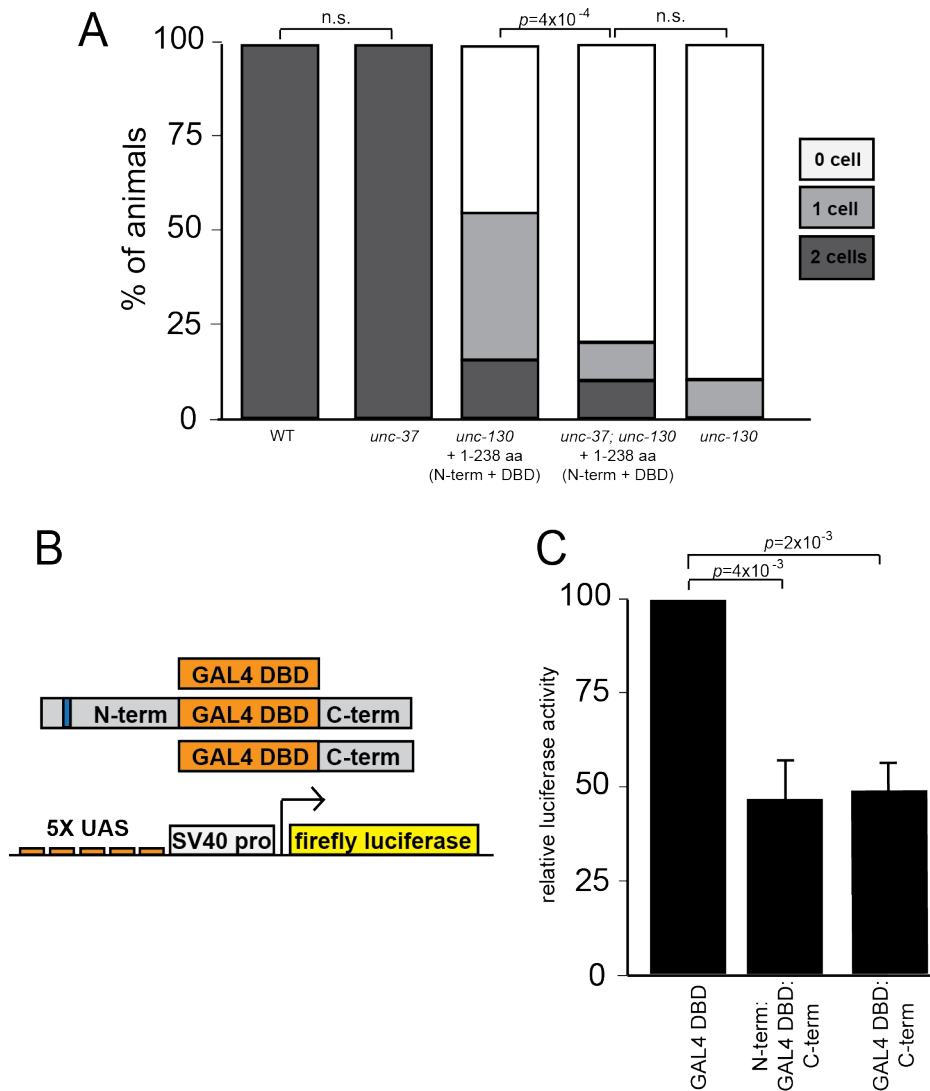

**Fig. S5. Related to Fig. 4**

(A) Percentage of animals expressing *grl-18*pro:YFP in zero, one, or two ILsoD glia in wild-type, *unc-37* mutants, and *unc-130* mutants with N-terminus rescue, *unc-130; unc-37* double mutants with N-terminus rescue, and *unc-130* mutants alone. n = 50 animals per condition. *p*-values were calculated by Fisher's Exact test. (B) Schematic diagram of constructs used in luciferase assays. (C) GAL4DBD alone, N-term:GAL4DBD:C-term, or GAL4DBD:C-term, along with a UAS-firefly luciferase reporter and constitutively expressed renilla luciferase were



transfected into HEK293T cells. Relative firefly luciferase activity, first normalized to renilla luciferase bioluminescence in each sample, and then to DBD-GAL4 alone. Error bars - SD;  $p$ -values calculated by Welch's t-test with Bonferroni correction for multiple t-tests.

**A**

UNC-130 -----MLFSMESILSSTKPKLEPPPKEP--EVTINEQVVDLPR--SNTRLSEPST  
 FoxD3 MTLSGGGSASDMSGQTVLTAEDVDIDVVGEGDDGLEEKDSADAGCDSPAGPPELRLDEADE

SASVLEHDLKFGESRKRSLGDEPTEDEDGVPVRKANKRNHSTSSAADSSDDAKDDDD  
 VPPAAPHHGQPQPPHQQLTLPKEAAGAGAGPGGDVGAPEADGCKGGVGGEEGGASGGG

DDDSTRKSMGHR-KSSHAKPPYSYIALIAMSILNSPEKKLTLSEICEFIINKFEYYKE  
 GAGSGSAGGLAPSKPKNSLVKPPYSYIALITMAILQSPQKLTLSGICEFISNRFYYRE  
 \*\*\*\*\* \* \* \* \* \* \*\*\*\*\* \* \* \* \* \*

KFFAWQNSIRHNLNLNDCFVKVARGPGNPGKGNYWALDPNCEMFDNGSFLRRRKRYKKN  
 KFFAWQNSIRHNLNLNDCFVKIPREPGNPGKGNYWLDPQSEDMFDNGSFLRRRKRFKRH  
 \*\*\*\*\* \* \* \* \* \* \*\*\*\*\* \* \* \* \* \* \*\*\*\*\* \* \* \* \* \*

SDTYH-----EMSHHPMPFPPFLPQGMPFP-PRMMHPMANIPMLGHPMNPRAVPNMPA  
 QQEHLREQTALMMQSFGAYSLAAAAGAAGPYGRPYGLHPAAAAAFAYSHPAAAAAAAAAAAA

FFIPQNIID-----SQKLLSMMASRIMPMDAPVS  
 LQYPYALPPVAPVLPAPVLLPSGELGRKAAAFGSQLGPGQLQLGLNSLGAAAAAAGTAGA

SGQKRTSSSSSSPNENGSSAVSDKLSA-----  
 AGTTASLIKSEPSARPSFSINIIGGGPAAPGGSAVGAGVAGGTGGSGGGSTAQSFLRPP  
 -----  
 GTVQSAALMATHQPLSLSRTTATIAPILSVPLSGQFLQPAASAAAAAAAAAAQAKWPAQ

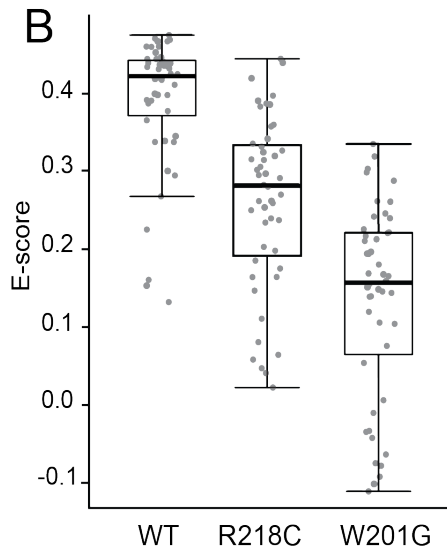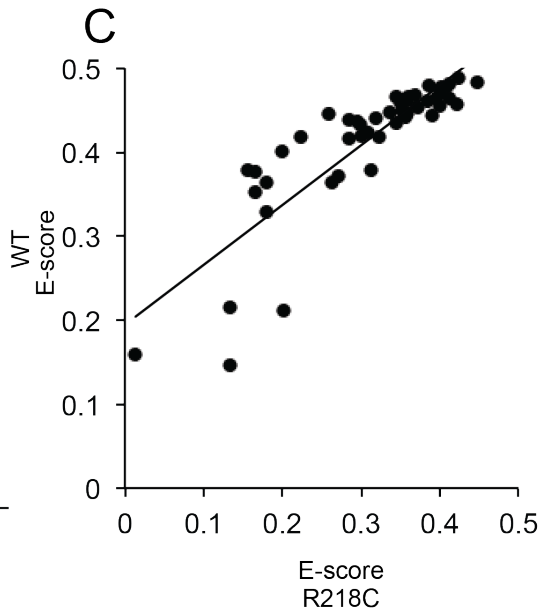

**Fig. S6. Related to Fig. 5**

(A) Alignment of UNC-130 (black) and FoxD3 (gray) sequences. DNA binding domain is highlighted in green. Eh1 motifs are highlighted in blue. Asterisks denote conserved amino acids in the DNA binding domain. Underlined residues are mutated in point mutants described in Fig. 5. (B) Technical replicate of PBM experiment from Fig. 5D. Scatter plot of E-scores for 8-mer DNA sequences matching [A/G][C/T]AAACA or AA[C/T]AACA from protein binding microarray (PBM) assays of wild-type, R218C, and W201G mutant proteins. Black lines represent population median, top and bottom of boxes are 25<sup>th</sup> and 75<sup>th</sup> percentiles, respectively, and top and bottom of whiskers are either most extreme point or 1.5x the interquartile range. *p*-values calculated by Mann-Whitney test. (C) Scatter plot of E-scores for 8-mer DNA sequences matching [A/G][C/T]AAACA or AA[C/T]AACA for wild-type versus R218C mutant proteins. Linear regression,  $R^2=0.72$

**Table S1. Penetrance of phenotypes in Fig. 1**

|                |                |              | % of animals with # of cells |    |     |    |                     |
|----------------|----------------|--------------|------------------------------|----|-----|----|---------------------|
| cell type      | marker         | genotype     | 0                            | 1  | 2   | n  | p-value             |
| <b>ILsoD</b>   | <i>grl-18</i>  | wt           | 0                            | 0  | 100 | 50 | $2 \times 10^{-29}$ |
|                |                | <i>ev505</i> | 90                           | 10 | 0   | 50 |                     |
| <b>ILsoD</b>   | <i>col-53</i>  | wt           | 0                            | 0  | 100 | 50 | $2 \times 10^{-29}$ |
|                |                | <i>ev505</i> | 88                           | 12 | 0   | 50 |                     |
| <b>ILsoD</b>   | <i>col-177</i> | wt           | 0                            | 6  | 94  | 50 | $2 \times 10^{-27}$ |
|                |                | <i>ev505</i> | 86                           | 14 | 0   | 50 |                     |
| <b>ILsoL/R</b> | <i>grl-18</i>  | wt           | 0                            | 0  | 100 | 50 | 1                   |
|                |                | <i>ev505</i> | 0                            | 0  | 100 | 50 |                     |
| <b>ILsoL/R</b> | <i>col-53</i>  | wt           | 0                            | 6  | 94  | 50 | 0.1                 |
|                |                | <i>ev505</i> | 0                            | 0  | 100 | 50 |                     |
| <b>ILsoL/R</b> | <i>col-177</i> | wt           | 8                            | 10 | 82  | 50 | 0.4                 |
|                |                | <i>ev505</i> | 2                            | 14 | 84  | 50 |                     |
| <b>ILsoV</b>   | <i>grl-18</i>  | wt           | 0                            | 0  | 100 | 50 | 1                   |
|                |                | <i>ev505</i> | 0                            | 0  | 100 | 50 |                     |
| <b>ILsoV</b>   | <i>col-53</i>  | wt           | 0                            | 4  | 96  | 50 | 1                   |
|                |                | <i>ev505</i> | 0                            | 4  | 96  | 50 |                     |
| <b>ILsoV</b>   | <i>col-177</i> | wt           | 0                            | 2  | 98  | 50 | 0.1                 |
|                |                | <i>ev505</i> | 0                            | 12 | 88  | 50 |                     |

**Table S2. Penetrance of IL neuron phenotypes.**

| cell type | marker       | genotype     | % of animals with # of cells |    |    |    | n  | p-value            |
|-----------|--------------|--------------|------------------------------|----|----|----|----|--------------------|
|           |              |              | 4                            | 5  | 6  | >6 |    |                    |
| IL1       | <i>flp-3</i> | wt           | 12                           | 10 | 78 | 0  | 50 | 9x10 <sup>-4</sup> |
|           |              | <i>ev505</i> | 16                           | 4  | 58 | 22 | 50 |                    |
| IL2       | <i>klp-6</i> | wt           | 4                            | 12 | 84 | 0  | 50 | 0.4                |
|           |              | <i>ev505</i> | 0                            | 12 | 84 | 4  | 50 |                    |

**Table S3. Penetrance of phenotypes in Fig. 2.**

| cell type    | marker         | genotype     | % of animals with # of cells |    |     |    |     | n  | p-value             |
|--------------|----------------|--------------|------------------------------|----|-----|----|-----|----|---------------------|
|              |                |              | 0                            | 1  | 2   | 3  | 4   |    |                     |
| <b>hyp3</b>  | <i>ceh-10</i>  | wt           | 0                            | 0  | 100 | -  | -   | 50 | $1 \times 10^{-10}$ |
|              |                | <i>ev505</i> | 0                            | 30 | 70  | -  | -   | 50 |                     |
| <b>URB</b>   | <i>nlp-6</i>   | wt           | 0                            | 2  | 98  | -  | -   | 50 | 1                   |
|              |                | <i>ev505</i> | 0                            | 4  | 96  | -  | -   | 50 |                     |
| <b>AMsh</b>  | <i>F16F9.3</i> | wt           | 0                            | 0  | 100 | -  | -   | 50 | $5 \times 10^{-7}$  |
|              |                | <i>ev505</i> | 6                            | 32 | 62  | -  | -   | 53 |                     |
| <b>CEPsh</b> | <i>hlh-17</i>  | wt           | 0                            | 0  | 0   | 0  | 100 | 50 | 0.2                 |
|              |                | <i>ev505</i> | 0                            | 0  | 0   | 6  | 94  | 50 |                     |
| <b>AMso</b>  | <i>grl-2</i>   | wt           | 0                            | 0  | 100 | 0  | 0   | 50 | $7 \times 10^{-8}$  |
|              |                | <i>ev505</i> | 0                            | 0  | 58  | 34 | 8   | 53 |                     |
| <b>PHsh</b>  | <i>F16F9.3</i> | wt           | 0                            | 12 | 88  | -  | -   | 50 | 1                   |
|              |                | <i>ev505</i> | 0                            | 14 | 86  | -  | -   | 50 |                     |
| <b>PHso</b>  | <i>grl-2</i>   | wt           | 0                            | 0  | 0   | 4  | 96  | 50 | 0.2                 |
|              |                | <i>ev505</i> | 0                            | 0  | 0   | 12 | 88  | 50 |                     |

**Table S4. Strains generated for this study**

| <b>ID</b> | <b>Genotype</b>                                                                                                | <b>Figures</b> |
|-----------|----------------------------------------------------------------------------------------------------------------|----------------|
| CHB3747   | <i>hmnEx2123</i> [ <i>grl-2</i> pro:CFP + <i>grl-18</i> pro:YFP]                                               | 1              |
| CHB3756   | <i>unc-130 (ev505); hmnEx2126</i> [ <i>grl-2</i> pro:CFP + <i>grl-18</i> pro:YFP]                              | 1              |
| CHB3310   | <i>hmnIs47</i> [ <i>grl-18</i> pro:mApple]; <i>ynIs78</i> [ <i>flp-8</i> pro:GFP]                              | 1, 5           |
| CHB3311   | <i>unc-130 (ev505); hmnIs47</i> [ <i>grl-18</i> pro:mApple]; <i>ynIs78</i> [ <i>flp-8</i> pro:GFP]             | 1              |
| CHB4124   | <i>hmnIs47</i> [ <i>grl-18</i> pro:mApple]; <i>hmnEx2227</i> [ <i>col-53</i> pro:GFP + pRF4]                   | 1              |
| CHB4143   | <i>unc-130 (ev505); hmnIs47</i> [ <i>grl-18</i> pro:mApple]; <i>hmnEx2227</i> [ <i>col-53</i> pro:GFP + pRF4]  | 1              |
| CHB4064   | <i>hmnIs47</i> [ <i>grl-18</i> pro:mApple]; <i>hmnEx2171</i> [ <i>col-177</i> pro:GFP + pRF4]                  | 1              |
| CHB4125   | <i>unc-130 (ev505); hmnIs47</i> [ <i>grl-18</i> pro:mApple]; <i>hmnEx2171</i> [ <i>col-177</i> pro:GFP + pRF4] | 1              |
| CHB3933   | <i>ujIs113; wgIs476</i>                                                                                        | S1             |
| CHB4067   | <i>ev505 ujIs113; wgIs476</i>                                                                                  | S1             |
| CHB4046   | <i>hmnIs100</i> [ <i>ceh-10</i> pro:GFP + pRF4]                                                                | 2              |
| CHB4047   | <i>unc-130 (ev505); hmnIs100</i> [ <i>ceh-10</i> pro:GFP + pRF4]                                               | 2              |
| CHB4066   | <i>hmnEx2237</i> [ <i>nlp-6</i> pro:GFP + pRF4]                                                                | 2              |
| CHB4163   | <i>unc-130 (ev505); hmnEx2237</i> [ <i>nlp-6</i> pro:GFP + pRF4]                                               | 2              |
| CHB3562   | <i>unc-130 (ev505); irIs67</i> [ <i>hlh-17</i> pro:GFP]                                                        | 2              |
| CHB1634   | <i>unc-130 (ev505); hmnIs13</i> [ <i>F16F9.3</i> pro:mCherry + <i>grl-2</i> pro:YFP + <i>gcy-8</i> pro:CFP]    | 2              |
| CHB1549   | <i>hmnIs13</i> [ <i>F16F9.3</i> pro:mCherry + <i>grl-2</i> pro:YFP + <i>gcy-8</i> pro:CFP]                     | 2              |
| CHB3850   | <i>hmnEx1910</i> [ <i>grl-2</i> pro:mCherry + <i>itr-1</i> pro:YFP + pRF4]                                     | S2             |
| CHB3355   | <i>unc-130 (ev505); hmnEx1910</i> [ <i>grl-2</i> pro:mCherry + <i>itr-1</i> pro:YFP + pRF4]                    | S2             |
| CHB3422   | <i>saIs14</i> [ <i>lin-48</i> pro:GFP]; <i>hmnEx1939</i> [ <i>grl-2</i> pro:mCherry + pRF4]                    | S2             |
| CHB3441   | <i>unc-130 (ev505); saIs14</i> [ <i>lin-48</i> pro:GFP]; <i>hmnEx1951</i> [ <i>grl-2</i> pro:mCherry; pRF4]    | S2             |

|         |                                                                                                                                                                                |         |
|---------|--------------------------------------------------------------------------------------------------------------------------------------------------------------------------------|---------|
| CHB3221 | <i>hmnEx1715</i> [F53F4.13pro:GFP + pRF4]; <i>hmnIs13</i> [F16F9.3pro:mCherry + <i>grl-2</i> pro:YFP + <i>gcy-8</i> pro:CFP]                                                   | S2      |
| CHB2966 | <i>hmnEx1683</i> [T02B11.3pro:GFP + pRF4]; <i>hmnIs13</i> [F16F9.3pro:mCherry + <i>grl-2</i> pro:YFP + <i>gcy-8</i> pro:CFP]                                                   | S2      |
| CHB3045 | <i>unc-130</i> ( <i>ev505</i> ); <i>hmnEx1715</i> [F53F4.13pro:GFP + pRF4]; <i>hmnIs13</i> [F16F9.3pro:mCherry + <i>grl-2</i> pro:YFP + <i>gcy-8</i> pro:CFP]                  | S2      |
| CHB3030 | <i>unc-130</i> ( <i>ev505</i> ); <i>hmnEx1683</i> [T02B11.3pro:GFP + pRF4]; <i>hmnIs13</i> [F16F9.3pro:mCherry + <i>grl-2</i> pro:YFP + <i>gcy-8</i> pro:CFP]                  | S2      |
| CHB2223 | <i>unc-130</i> ( <i>ev505</i> ); <i>myIs4</i> [ <i>pkd-2</i> pro:GFP] <i>him-5</i> ( <i>e1490</i> )                                                                            | S2      |
| CHB4308 | <i>unc-130</i> ( <i>ev505</i> ); <i>hmnEx2293</i> [ <i>mir-228</i> pro:histone-GFP]; <i>hmnEx1949</i> [ <i>grl-2</i> pro:mApple + pRF4]                                        | S2      |
| CHB4309 | <i>unc-130</i> ( <i>ev505</i> ); <i>lin-48</i> ( <i>sa469</i> ); <i>hmnIs13</i> [F16F9.3pro:mCherry + <i>grl-2</i> pro:YFP + <i>gcy-8</i> pro:CFP]                             | S2      |
| CHB4302 | <i>lin-48</i> ( <i>sa469</i> ); <i>hmnIs13</i> [F16F9.3pro:mCherry + <i>grl-2</i> pro:YFP + <i>gcy-8</i> pro:CFP]                                                              | S2      |
| CHB2958 | <i>hmnEx1676</i> [ <i>grl-2</i> pro:mApple + <i>grl-18</i> pro:GFP]                                                                                                            | S2      |
| CHB2961 | <i>unc-130</i> ( <i>ev505</i> ); <i>hmnEx1679</i> [ <i>grl-2</i> pro:mApple + <i>grl-18</i> pro:GFP]                                                                           | S2      |
| CHB3775 | <i>hmnIs82</i> [ <i>grl-18</i> pro:GFP]                                                                                                                                        | 3       |
| CHB4160 | <i>unc-130</i> ( <i>ev505</i> ); <i>hmnIs82</i> [ <i>grl-18</i> pro:GFP]                                                                                                       | 3       |
| CHB3313 | <i>unc-130</i> ( <i>ev505</i> ); <i>hmnEx1903</i> [ <i>unc-130</i> pro4: <i>unc-130</i> + <i>grl-18</i> pro:GFP + <i>flp-8</i> pro:mCherry + pRF4]                             | 3, 4, 5 |
| CHB4174 | <i>unc-130</i> ( <i>ev505</i> ); <i>hmnIs82</i> [ <i>grl-18</i> pro:GFP]; <i>hmnEx2273</i> [ <i>mnm-2</i> pro: <i>unc-130</i> + pRF4]                                          | 3       |
| CHB4157 | <i>unc-130</i> ( <i>ev505</i> ); <i>hmnIs82</i> ; <i>hmnEx2282</i> [ <i>mir-228</i> pro: <i>unc-130</i> + <i>grl-18</i> pro:YFP + pRF4]                                        | 3       |
| CHB4158 | <i>unc-130</i> ( <i>ev505</i> ); <i>hmnEx2283</i> [ <i>hsp16-2</i> pro: <i>unc-130</i> + <i>hsp16-41</i> pro: <i>unc-130</i> + <i>grl-18</i> pro:YFP + <i>unc-122</i> pro:RFP] | 3       |
| CHB1996 | <i>hmnEx1138</i> [ <i>mnm-2</i> pro:GFP + <i>egl-38</i> pro:nls-mCherry + pRF4]                                                                                                | S4      |
| CHB3447 | <i>unc-130</i> ( <i>ev505</i> ); <i>hmnEx1964</i> [ <i>unc-130</i> pro4:DBD + <i>grl-18</i> pro:GFP + <i>flp-8</i> pro:mCherry + pRF4]                                         | 4       |
| CHB3428 | <i>unc-130</i> ( <i>ev505</i> ); <i>hmnEx1945</i> [ <i>unc-130</i> pro4:DBD-VP64 + <i>grl-18</i> pro:GFP + <i>flp-8</i> pro:mCherry + pRF4]                                    | 4       |
| CHB3381 | <i>unc-130</i> ( <i>ev505</i> ); <i>hmnEx1922</i> [ <i>unc-130</i> pro4:N-TERM + <i>grl-18</i> pro:GFP + <i>flp-8</i> pro:mCherry + pRF4]                                      | 4       |



|         |                                                                                                          |    |
|---------|----------------------------------------------------------------------------------------------------------|----|
| CHB3402 | <i>unc-130 (ev505); hmnEx1927 [unc-130pro4: del eh1 N-TERM + grl-18pro:GFP + flp-8:mCherry + pRF4]</i>   | 4  |
| CHB3427 | <i>unc-130 (ev505); hmnEx1944 [unc-130pro4:C-TERM + grl-18pro:GFP + flp-8:mCherry + pRF4]</i>            | 4  |
| CHB4144 | <i>unc-130 (ev505); hmnEx2275 [unc-130pro4:DBD-Engrailed + grl-18pro:GFP + pRF4]</i>                     | 4  |
| CHB4139 | <i>unc-130 (ev505); hmnEx2274 [unc-130pro4: del eh1 unc-130 + grl-18pro:YFP + F16F9.3pro:CFP + pRF4]</i> | 4  |
| CHB4311 | <i>unc-130 (ev505); unc-37(e262) hmnEx2345 [unc-130pro4:N-TERM + grl-18pro:GFP + unc-122pro:RFP]</i>     | S5 |
| CHB4310 | <i>unc-37 (e262); hmnIs82 [grl-18pro:GFP]</i>                                                            | S5 |
| CHB3381 | <i>unc-130 (hd12); hmnIs47 [grl-18pro:mApple]; ynIs48 [flp-8pro:GFP]</i>                                 | 5  |
| CHB3382 | <i>unc-130 (ns313); hmnIs47 [grl-18pro:mApple]; ynIs48 [flp-8pro:GFP]</i>                                | 5  |
| CHB3384 | <i>unc-130 (oy10); hmnIs47 [grl-18pro:mApple]; ynIs48 [flp-8pro:GFP]</i>                                 | 5  |
| CHB3382 | <i>unc-130 (ev659); hmnIs47 [grl-18pro:mApple]; ynIs48 [flp-8pro:GFP]</i>                                | 5  |
| CHB3378 | <i>unc-130 (op459); hmnIs47 [grl-18pro:mApple]; ynIs48 [flp-8pro:GFP]</i>                                | 5  |
| CHB3411 | <i>unc-130 (ev505); hmnEx1936 [unc-130pro4:FOXD3, grl-18pro:GFP, flp-8:mCherry, pRF4]</i>                | 5  |

**Table S5. Strains generated in previous studies**

| <b>ID</b> | <b>Genotype</b>                                                                                                                                               | <b>Fig.</b> | <b>Source/Reference</b>  |
|-----------|---------------------------------------------------------------------------------------------------------------------------------------------------------------|-------------|--------------------------|
| OP476     | <i>wgIs476</i> [ <i>unc-86::TY1::EGFP::3xFLAG</i> ]                                                                                                           | S1          | (Sarov et al., 2006)     |
| VPR839    | <i>irIs67</i> [ <i>hlh-17</i> pro:GFP]; <i>unc-119</i>                                                                                                        | 2           | (Stout & Parpura, 2011)  |
| CM117     | <i>saIs14</i> [ <i>lin-48</i> pro:GFP]                                                                                                                        | S2          | (Johnson et al., 2001)   |
| OP77      | <i>wgIs77</i> [ <i>unc-130::TY1::EGFP::3xFLAG</i> ]                                                                                                           | 3           | (Sarov et al., 2006)     |
| RW11144   | <i>itIs37</i> [ <i>pie-1</i> pro:mCherry], <i>stIs10116</i> [ <i>his-72</i> pro: <i>his-24</i> :mCherry]; <i>wgIs76</i> [ <i>unc-130::TY1::EGFP::3xFLAG</i> ] | 3, S3       | (Murray et al., 2012)    |
| OS4260    | <i>nsIs198</i> [ <i>mir-228</i> pro:GFP]                                                                                                                      | S4          | (Pierce et al., 2008)    |
| PT621     | <i>myIs4</i> [ <i>pkd-2</i> pro:GFP] <i>him-5</i> ( <i>e1490</i> )                                                                                            | S2          | (Barr & Sternberg, 1999) |

**Table S6. Plasmids generated for this study**

| <b>ID</b> | <b>Name</b>                                    |
|-----------|------------------------------------------------|
| pKM47     | <i>grl-18</i> pro:YFP                          |
| pKM15     | <i>grl-2</i> pro:YFP                           |
| pKM117    | <i>grl-2</i> pro:CFP                           |
| pIL36     | <i>grl-2</i> pro:mCherry                       |
| pIL41     | <i>grl-2</i> pro:mApple                        |
| pKM16     | <i>F16F9.3</i> pro:CFP                         |
| pKM55     | pDest15 UNC-130 DBD                            |
| pKM69     | pDest15 R218C UNC-130 DBD                      |
| pKM71     | pDest15 W201G UNC-130 DBD                      |
| pKM59     | <i>unc-130</i> pro4:UNC-130                    |
| pKM77     | <i>unc-130</i> pro4:N-term:UNC-130 DBD         |
| pKM79     | <i>unc-130</i> pro4:UNC-130 DBD:C-term         |
| pKM88     | <i>unc-130</i> pro4:del eh1 N-term:UNC-130 DBD |
| pKM78     | <i>unc-130</i> pro4:UNC-130 DBD                |
| pKM83     | <i>unc-130</i> pro4:UNC-130 DBD VP64           |
| pKM80     | <i>unc-130</i> pro4: del eh1 UNC-130           |
| pKM115    | 5XUAS SV40pro:firefly luciferase               |
| pKM114    | CAGpro: renilla luciferase                     |

|        |                                                  |
|--------|--------------------------------------------------|
| pKM111 | CAGpro:GAL4DBD:UNC-130 C-term                    |
| pKM113 | CAGpro:GAL4DBD                                   |
| pKM108 | CAGpro:UNC-130 N-term:GAL4DBD:<br>UNC-130 C-term |
| pKM72  | <i>unc-130</i> pro4:FOXD3                        |
| pKM119 | <i>mir-228</i> pro:unc-130                       |
| pKM118 | <i>mnm-2</i> pro:unc-130                         |
| pKM67  | <i>hsp16-2</i> pro:unc-130                       |
| pKM68  | <i>hsp16-41</i> pro:unc-130                      |
| pKM126 | <i>nlp-6</i> pro:GFP                             |
| pKM123 | <i>ceh-10</i> pro:GFP                            |

**Table S7. Primers of general interest**

| <b>Name</b>     | <b>Sequence</b>                     |
|-----------------|-------------------------------------|
| unc-130pro4_fwd | gtactCCTGCAGGctttcaattgaaaattccgaga |
| unc-130pro4_rev | gatcGGCGCGCCtggtACCGGTgtctacctagt   |
